# Supplementary material for: Nivolumab versus investigator’s choice in patients with recurrent or metastatic squamous cell carcinoma of the head and neck: Efficacy and safety in CheckMate 141 by age
Source: PubMed Central journal article supplement — Oral Oncol. Author manuscript; Available in PMC 2020 Dec 9. (PMC7723820; doi:10.1016/j.oraloncology.2019.06.017), 2019-07-03

**Nivolumab versus investigator's choice in patients with recurrent or metastatic squamous cell carcinoma of the head and neck: efficacy and safety in CheckMate 141 by age**

**Supplementary Table 1**

Relative dosing intensity. <sup>a</sup>Dose units are mg/m<sup>2</sup> for IC and mg/kg for nivolumab. Abbreviation: IC = investigator's choice.

|                                              | <65 Years              |                      |                          |                       | ≥65 Years             |                       |                          |                       |
|----------------------------------------------|------------------------|----------------------|--------------------------|-----------------------|-----------------------|-----------------------|--------------------------|-----------------------|
|                                              | Nivolumab<br>(n = 168) | IC (n = 71)          |                          |                       | Nivolumab<br>(n = 68) | IC (n = 40)           |                          |                       |
|                                              |                        | Cetuximab<br>(n = 9) | Methotrexate<br>(n = 29) | Docetaxel<br>(n = 33) |                       | Cetuximab<br>(n = 4)  | Methotrexate<br>(n = 17) | Docetaxel<br>(n = 19) |
| No. of doses received, median (range)        | 5.0 (1–70)             | 8.0 (3–32)           | 8.0 (1–18)               | 9.0 (1–41)            | 5.0 (1–72)            | 8.5 (8–10)            | 6.0 (1–17)               | 7.0 (1–27)            |
| Duration of therapy, median (range)          | 1.9 (0–36)             | 1.6 (0–7)            | 1.9 (0–6)                | 2.0 (0–13)            | 1.9 (0–35)            | 1.8 (2–2)             | 1.6 (0–5)                | 1.9 (0–9)             |
| Cumulative dose, <sup>a</sup> median (range) | 14.9<br>(3–223)        | 2192.3<br>(923–8232) | 280.0<br>(27–725)        | 316.6<br>(30–1654)    | 15.1<br>(3–232)       | 2345.3<br>(2139–2660) | 244.2<br>(79–661)        | 214.6<br>(30–977)     |
| Relative dose intensity, n (%)               |                        |                      |                          |                       |                       |                       |                          |                       |
| ≥110                                         | 0                      | 1 (11.1)             | 0                        | 11 (33.3)             | 0                     | 0                     | 0                        | 4 (21.1)              |
| 90–<110                                      | 136 (81.0)             | 6 (66.7)             | 15 (51.7)                | 13 (39.4)             | 57 (83.8)             | 4 (100.0)             | 8 (47.1)                 | 7 (36.8)              |
| 70–<90                                       | 27 (16.1)              | 2 (22.2)             | 8 (27.6)                 | 6 (18.2)              | 9 (13.2)              | 0                     | 5 (29.4)                 | 4 (21.1)              |
| 50–<70                                       | 4 (2.4)                | 0                    | 2 (6.9)                  | 3 (9.1)               | 2 (2.9)               | 0                     | 2 (11.8)                 | 3 (15.8)              |
| <50                                          | 1 (0.6)                | 0                    | 4 (13.8)                 | 0                     | 0                     | 0                     | 1 (5.9)                  | 1 (5.3)               |
| Unknown                                      | 0                      | 0                    | 0                        | 0                     | 0                     | 0                     | 1 (5.9)                  | 0                     |

## Supplementary Table 2

Select treatment-related adverse events (TRAEs). Abbreviation: IC = investigator's choice.

|                                        | <65 Years              |              |                |              | ≥65 Years             |              |                |              |
|----------------------------------------|------------------------|--------------|----------------|--------------|-----------------------|--------------|----------------|--------------|
|                                        | Nivolumab<br>(n = 168) |              | IC<br>(n = 71) |              | Nivolumab<br>(n = 68) |              | IC<br>(n = 40) |              |
|                                        | Any<br>Grade           | Grade<br>3-4 | Any<br>Grade   | Grade<br>3-4 | Any<br>Grade          | Grade<br>3-4 | Any<br>Grade   | Grade<br>3-4 |
| Select TRAE, n (%)                     |                        |              |                |              |                       |              |                |              |
| Skin                                   | 27 (16.1)              | 0            | 7 (9.9)        | 0            | 14 (20.6)             | 0            | 7 (17.5)       | 2 (5.0)      |
| Endocrine                              | 15 (8.9)               | 1 (0.6)      | 0              | 0            | 7 (10.3)              | 0            | 1 (2.5)        | 0            |
| Gastrointestinal                       | 13 (7.7)               | 1 (0.6)      | 7 (9.9)        | 1 (1.4)      | 7 (10.3)              | 0            | 9 (22.5)       | 1 (2.5)      |
| Hepatic                                | 6 (3.6)                | 2 (1.2)      | 3 (4.2)        | 1 (1.4)      | 1 (1.5)               | 0            | 2 (5.0)        | 0            |
| Pulmonary                              | 6 (3.6)                | 2 (1.2)      | 1 (1.4)        | 0            | 1 (1.5)               | 0            | 0              | 0            |
| Hypersensitivity/<br>infusion reaction | 2 (1.2)                | 0            | 2 (2.8)        | 1 (1.4)      | 1 (1.5)               | 0            | 0              | 0            |
| Renal                                  | 2 (1.2)                | 0            | 2 (2.8)        | 1 (1.4)      | 1 (1.5)               | 0            | 0              | 0            |

## Supplementary Figure 1

### Patient disposition

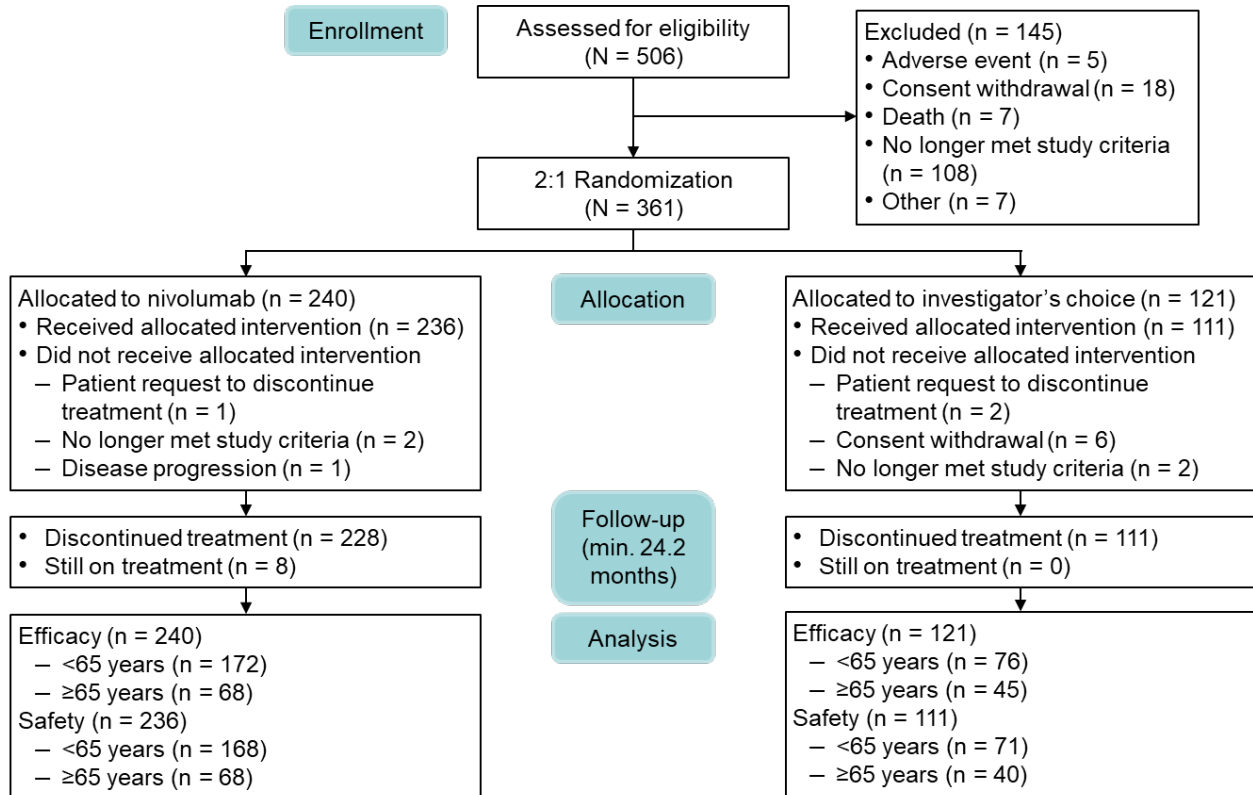

Supplement: NIHMS1649630-supplement-Supplemental_Information.pdf [file NIHMS1649630-supplement-Supplemental_Information.pdf]
